# Supplementary material for: Crystallization and hardening of poly(ethylene-co-vinyl acetate) mouthguards during routine use
Source: PubMed Central journal article supplement (PMC5353674; doi:10.1038/srep44672), 2017-03-15
Supplement: srep44672-s1.pdf [file srep44672-s1.pdf]

## **Crystallization and hardening of poly(ethylene-co-vinyl acetate) mouthguards during routine use**

Ryoko Kuwahara<sup>1</sup>, Ryotaro Tomita<sup>1</sup>, Natsumi Ogawa<sup>1</sup>, Kazunori Nakajima<sup>2</sup>, Tomotaka Takeda<sup>2</sup>, Hiroki Uehara<sup>1</sup>, and Takeshi Yamanobe<sup>1</sup>

<sup>1</sup> Division of Molecular Science, Graduate School of Science and Technology, Gunma University, Kiryu, Gunma, Japan

<sup>2</sup> Department of Oral Health and Clinical Science, Division of Sports Dentistry, Tokyo Dental College, Chiyoda-ku, Tokyo, Japan

Correspondence: Professor T. Yamanobe, Gunma University

E-mail: yamanobe@gunma-u.ac.jp

**Table S1** Effect of temperature fluctuations verified using pulse NMR spectroscopy.

| Sample | Treatment                | Unannealed   |                     | Annealed at 60°C |                     | Annealed at 80°C |                     | Annealed at 100°C |                     |
|--------|--------------------------|--------------|---------------------|------------------|---------------------|------------------|---------------------|-------------------|---------------------|
|        | Fraction, T <sub>2</sub> | Fraction (%) | T <sub>2</sub> (μs) | Fraction (%)     | T <sub>2</sub> (μs) | Fraction (%)     | T <sub>2</sub> (μs) | Fraction (%)      | T <sub>2</sub> (μs) |
| EVA9   | Rigid                    | 34.9         | 9.80                | 36.1             | 9.20                | 36.9             | 8.90                | 34.3              | 9.80                |
|        | Intermediate             | 53.2         | 40.8                | 51.6             | 42.9                | 51.6             | 39.5                | 54.5              | 39.2                |
|        | Mobile                   | 11.8         | 216                 | 12.3             | 242                 | 11.5             | 221                 | 11.2              | 214                 |
| EVA14  | Rigid                    | 29.5         | 11.0                | 30.4             | 10.0                | 30.6             | 9.90                | 28.8              | 12.0                |
|        | Intermediate             | 56.4         | 45.4                | 54               | 47.8                | 55.8             | 43.4                | 59.0              | 41.9                |
|        | Mobile                   | 14.1         | 242                 | 15.6             | 262                 | 13.6             | 233                 | 12.2              | 216                 |
| EVA28  | Rigid                    | 20.3         | 12.5                | 19.3             | 11.0                | 21.1             | 12.4                | 21.5              | 12.5                |
|        | Intermediate             | 52.6         | 70.1                | 52.3             | 69.5                | 53.9             | 62.7                | 53.4              | 64.3                |
|        | Mobile                   | 27.1         | 379                 | 28.5             | 375                 | 25.0             | 329                 | 25.2              | 335                 |

(a)

$$M(t) = A_r e^{-\frac{1}{2}\left(\frac{t}{T_{2r}}\right)^2} + A_i e^{-\frac{t}{T_{2i}}} + A_m e^{-\frac{t}{T_{2m}}}$$

$A_r$ : Fraction of the rigid component

$A_i$ : Fraction of the intermediate component

$A_m$ : Fraction of the mobile component

$T_{2r}$ :  $T_2$  value for the rigid component

$T_{2i}$ :  $T_2$  value for the intermediate component

$T_{2m}$ :  $T_2$  value for the mobile component

(b)

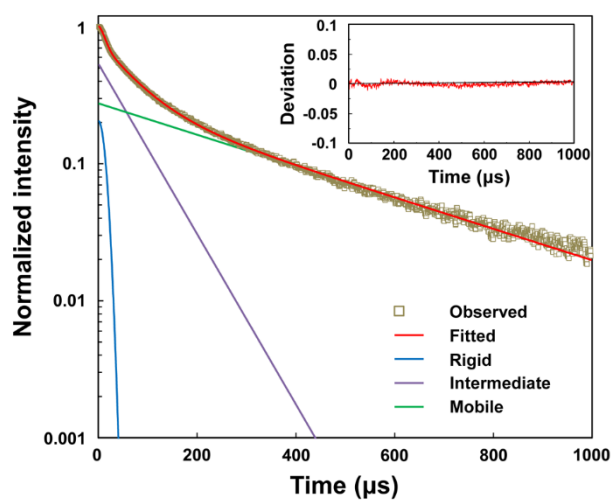

**Figure S1.** (a) The equation for the curve of best fit and (b) example of curve-fitting for a relaxation decay curve recorded with a drawing time of 1000  $\mu\text{s}$  for the EVA sample, assuming three-component resolutions using the above-mentioned equation. The inset figure depicts the deviation of the fitting value from the experiment value.

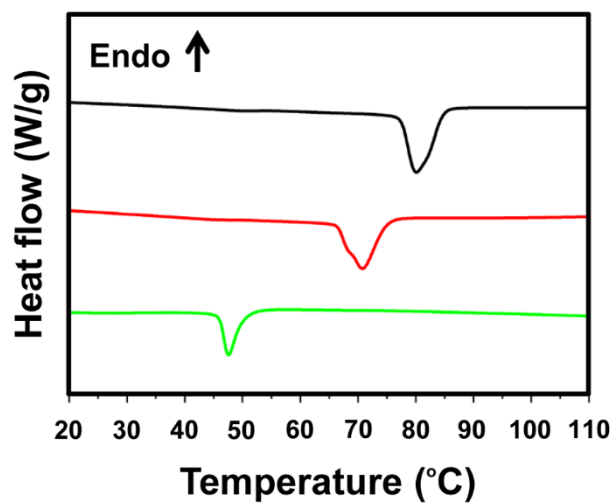

**Figure S2.** DSC curves of the cooling process of EVA9 (black), EVA14 (red), and EVA28 (green).

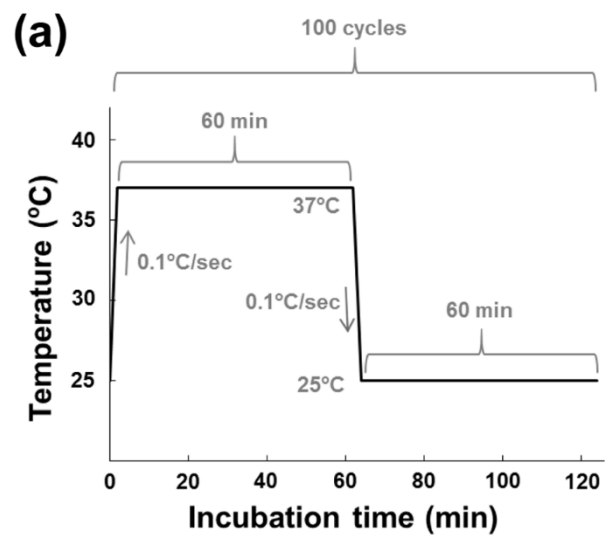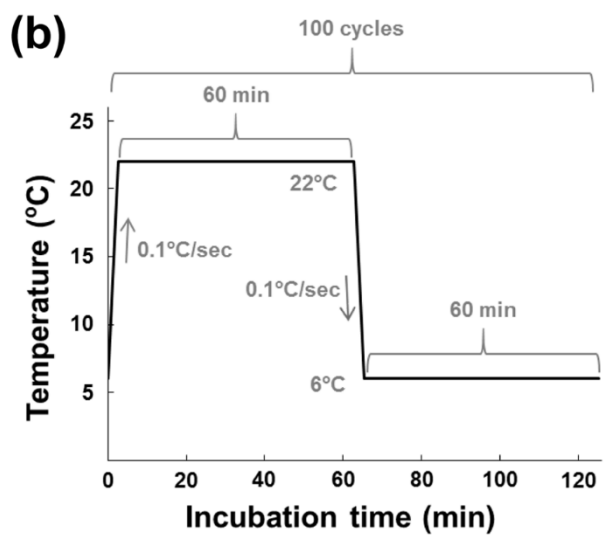

**Figure S3.** Thermal cycler protocols with repeated temperature fluctuations (a) between 25°C for 60 min and 37°C for 60 min, and (b) between 6°C for 60 min and 22°C for 60 min.

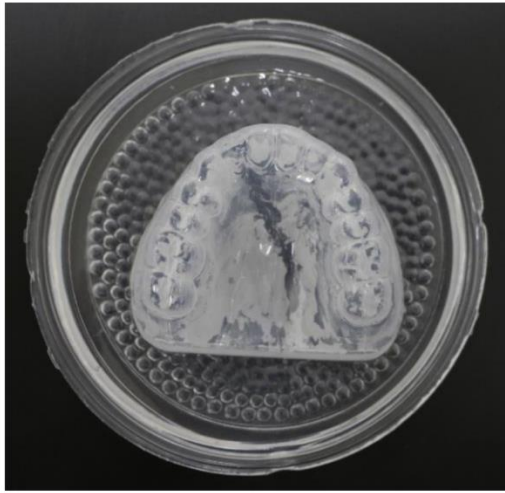

**Typical MG**

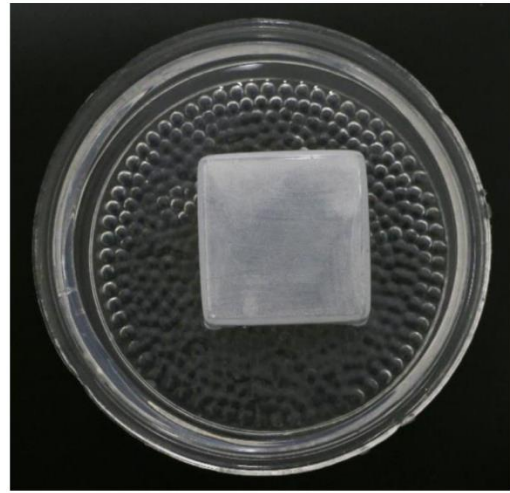

**Box type MG imitate**

**Figure S4.** A typical MG (left) and a box-type MG imitate (right) prepared from clear-transparent Drufosoft® Type SQ EVA using the dental pressure laminate machine, Drufomat SQ.

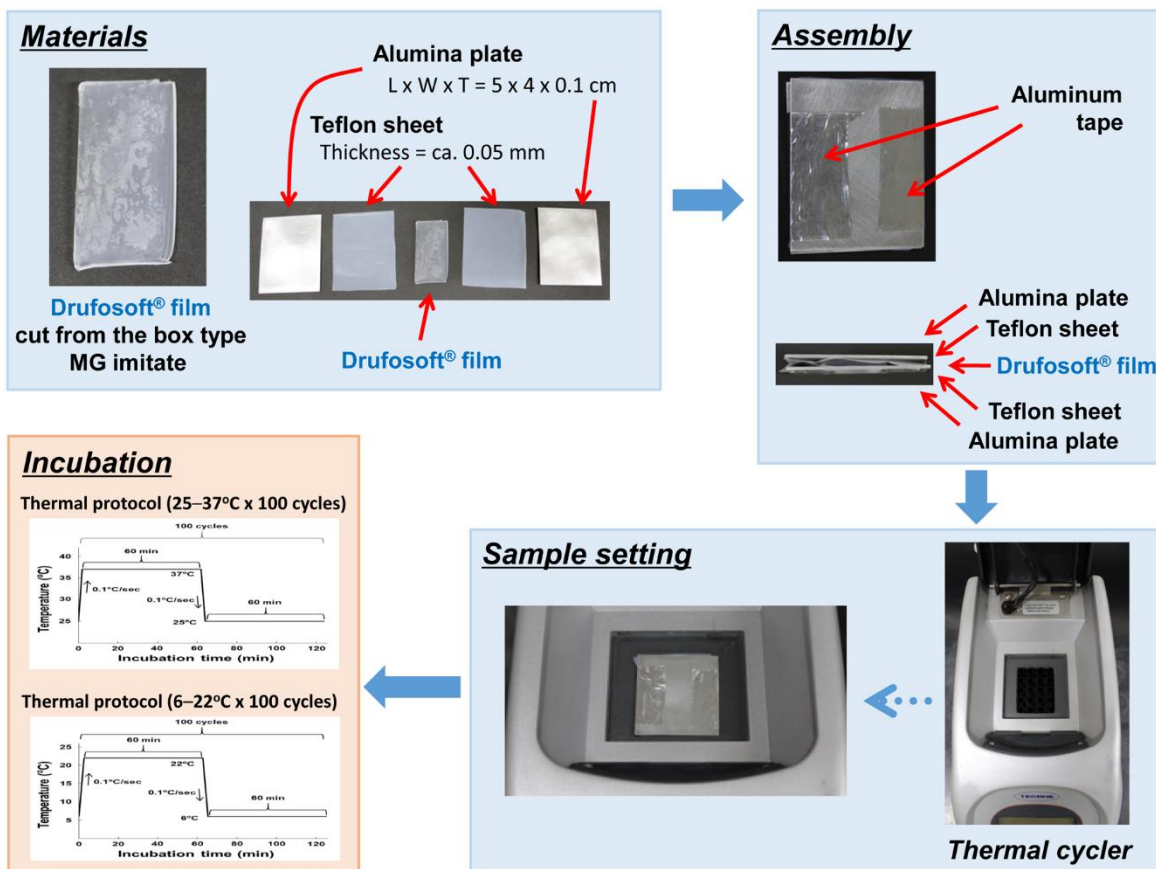

**Figure S5.** Schematic illustration of the preparation of thermal-treated samples for the repeated thermal cycle experiments.
